# Supplementary material for: Carbon Quantum Dots-Doped Ni3Se4/Co9Se8/Fe3O4 Multilayer Nanosheets Prepared Using the One-Step Solvothermal Method to Boost Electrocatalytic Oxygen Evolution
Source: MDPI journal article supplement (doi:10.3390/ma16145115), 2023-07-20
Supplement: s1 [file s1]

## Supporting Information

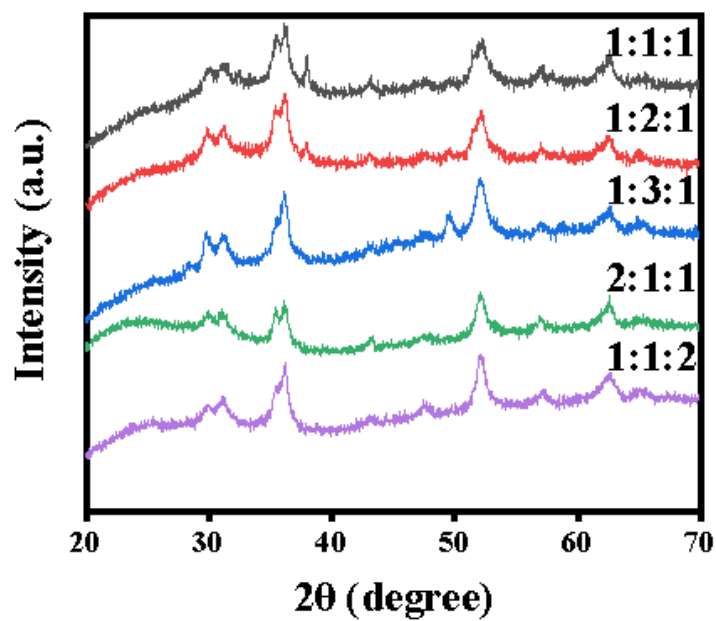

Figure S1. XRD map of  $\text{Co}_9\text{Se}_8/\text{Ni}_3\text{Se}_4/\text{Fe}_3\text{O}_4@\text{C}$  with different Co/Ni/Fe ratios.

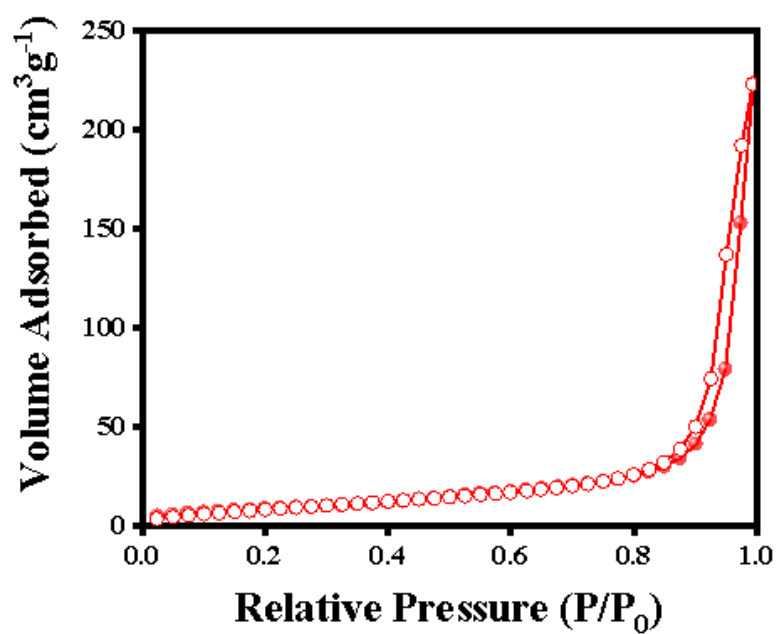

Figure S2. Nitrogen constant temperature adsorption-desorption curve of  $\text{Co}_9\text{Se}_8/\text{Ni}_3\text{Se}_4/\text{Fe}_3\text{O}_4@\text{C}$ .

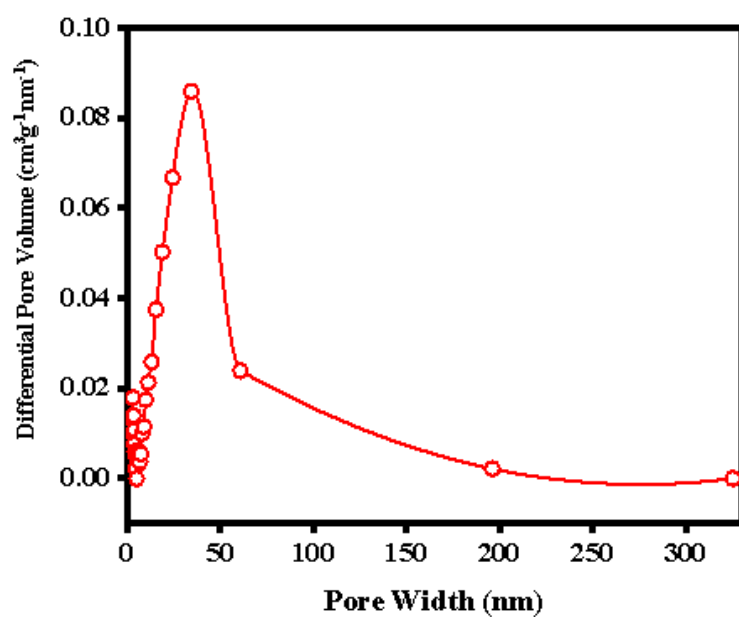

**Figure S3.** Pore size distribution of Co<sub>9</sub>Se<sub>8</sub>/Ni<sub>3</sub>Se<sub>4</sub>/Fe<sub>3</sub>O<sub>4</sub>@C.

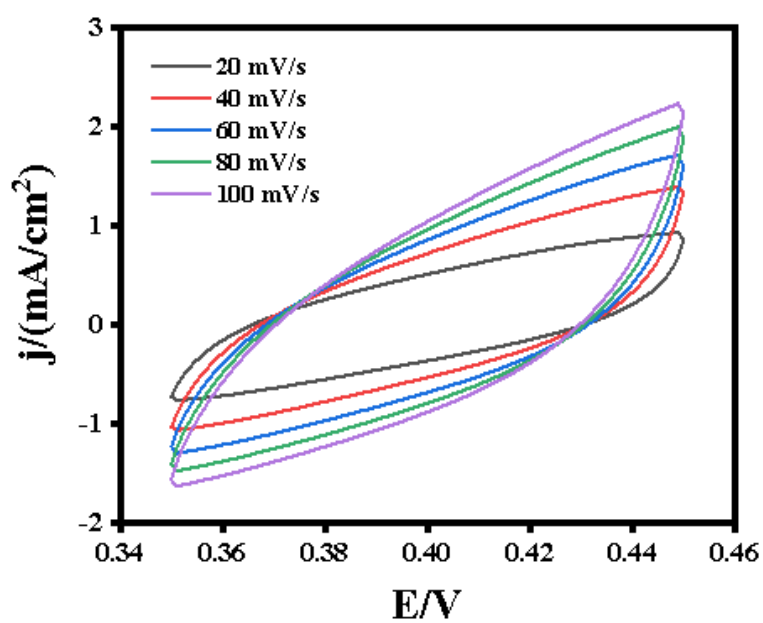

**Figure S4.** CV curves of Fe<sub>0.33</sub>Co<sub>0.33</sub>Ni<sub>0.33</sub>OSe@C.

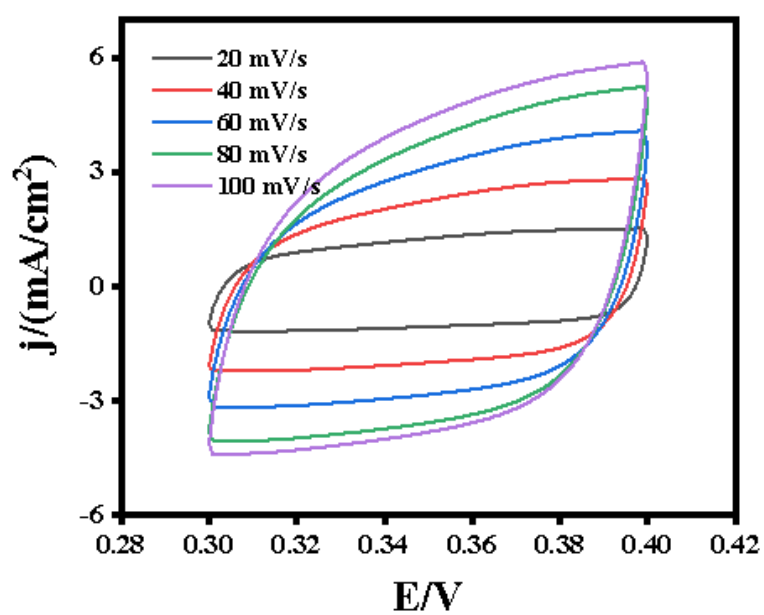

**Figure S5.** CV curves of  $\text{Fe}_{0.25}\text{Co}_{0.5}\text{Ni}_{0.25}\text{OSe@C}$ .

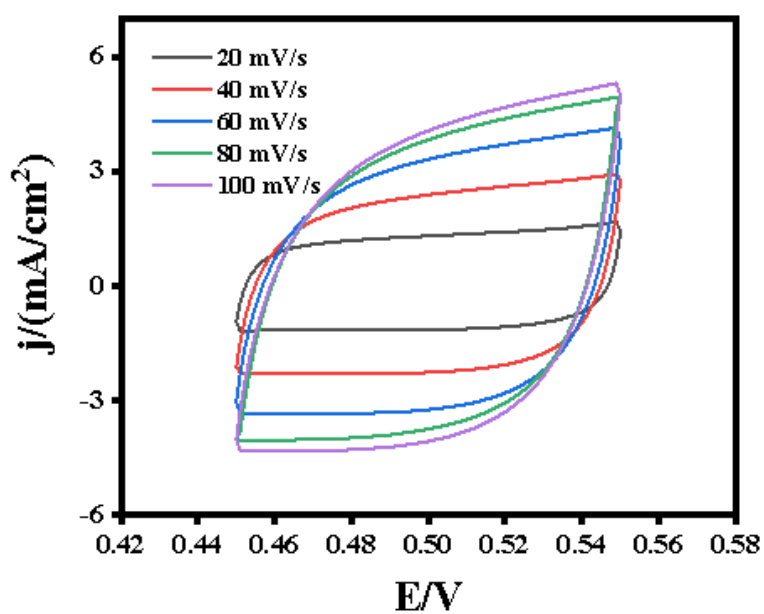

**Figure S6.** CV curves of  $\text{Fe}_{0.2}\text{Co}_{0.6}\text{Ni}_{0.2}\text{OSe@C}$ .

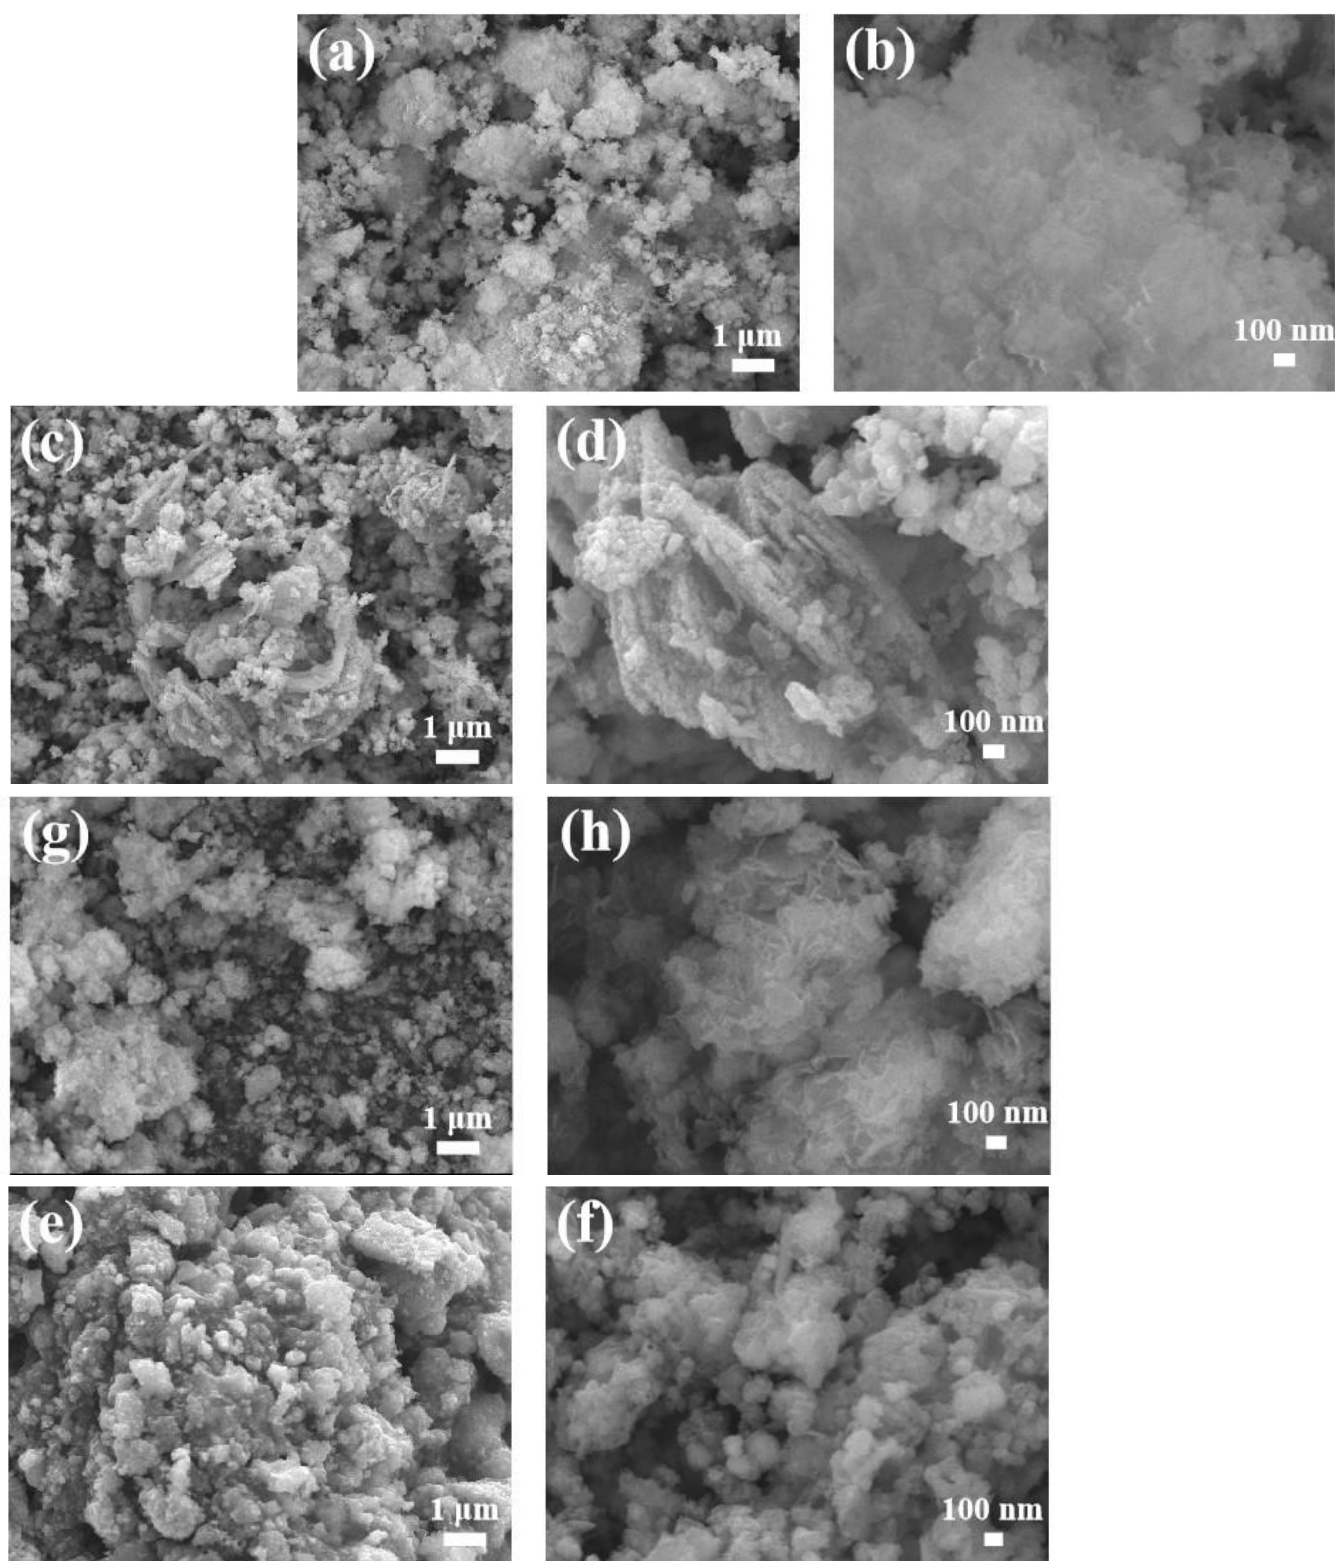

**Figure S7.** SEM images of  $\text{Co}_9\text{Se}_8/\text{Ni}_3\text{Se}_4/\text{Fe}_3\text{O}_4@\text{C}$  with different Co/Ni/Fe ratios: (a,b)  $\text{Fe}_{0.33}\text{Co}_{0.33}\text{Ni}_{0.33}\text{OSe}@\text{C}$ , (c,d)  $\text{Fe}_{0.25}\text{Co}_{0.5}\text{Ni}_{0.25}\text{OSe}@\text{C}$ , (e,f)  $\text{Fe}_{0.5}\text{Co}_{0.25}\text{Ni}_{0.25}\text{OSe}@\text{C}$ , (g,h)  $\text{Fe}_{0.25}\text{Co}_{0.25}\text{Ni}_{0.5}\text{OSe}@\text{C}$ .

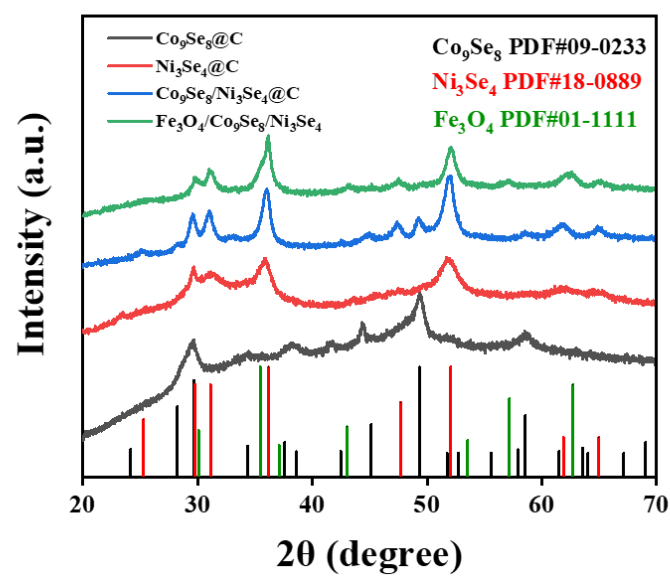

**Figure S8.** XRD patterns of single/multi-component samples prepared using the same experimental method.

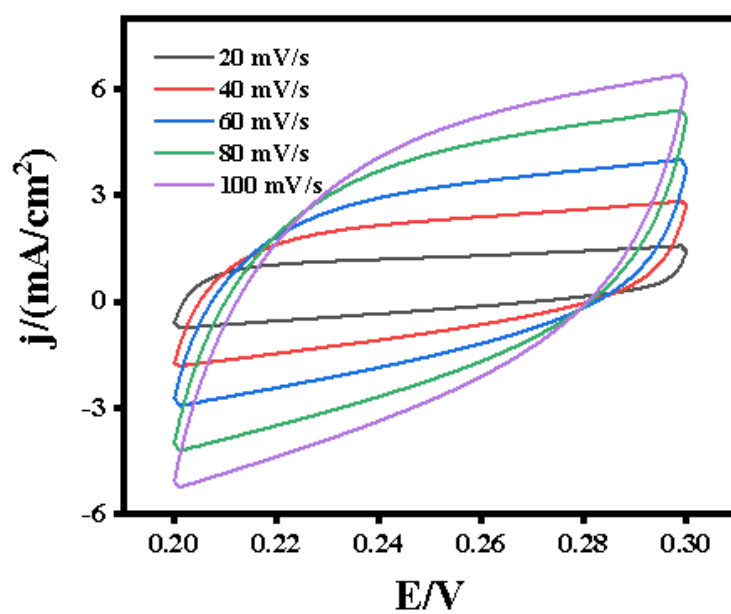

**Figure S9.** CV curves of  $\text{Co}_9\text{Se}_8@\text{C}$ .

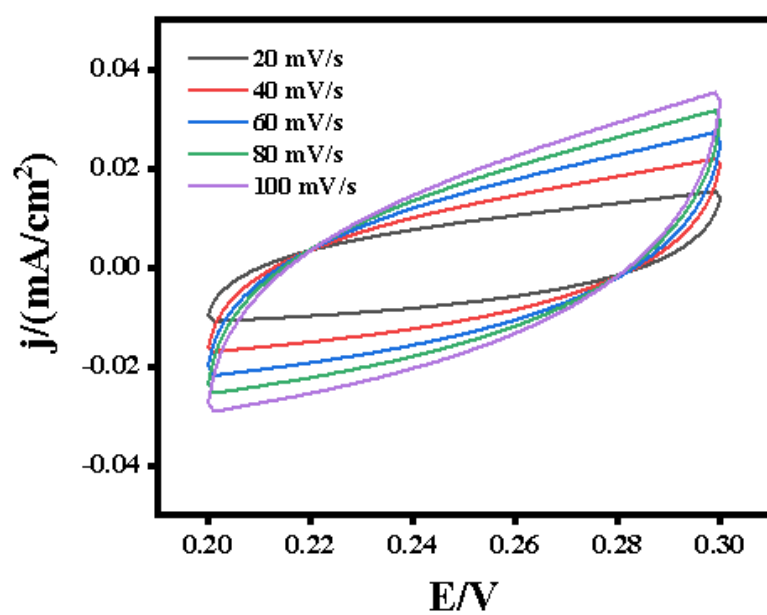

Figure S10. CV curves of Ni<sub>3</sub>Se<sub>4</sub>@C.

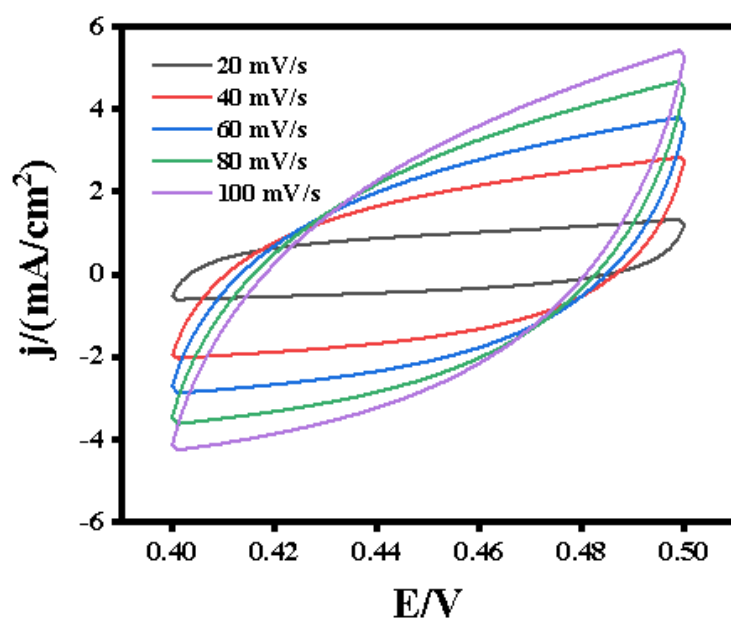

Figure S11. CV curves of Co<sub>9</sub>Se<sub>8</sub>/Ni<sub>3</sub>Se<sub>4</sub>@C.

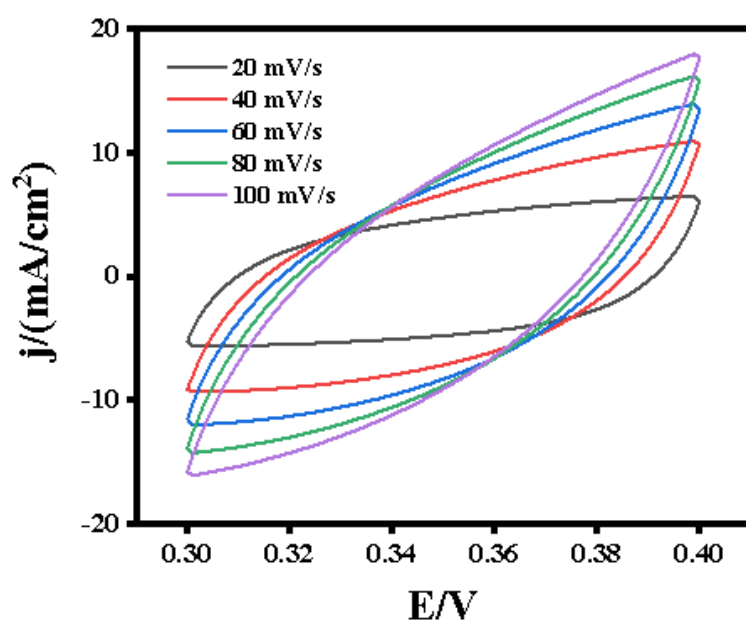

**Figure S12.** CV curves of Fe<sub>3</sub>O<sub>4</sub>/Co<sub>9</sub>Se<sub>8</sub>/Ni<sub>3</sub>Se<sub>4</sub>.

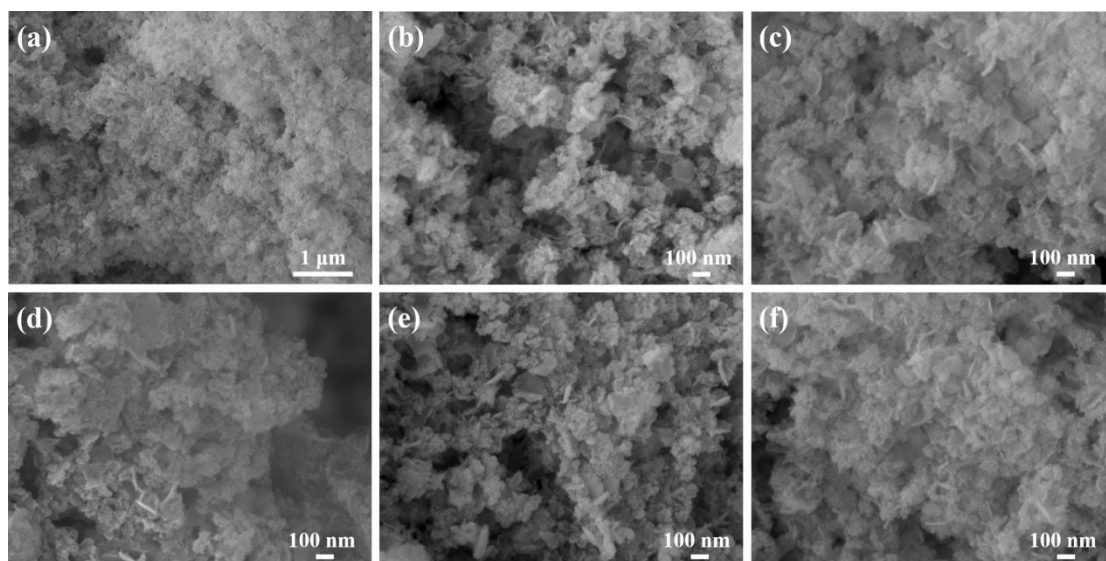

**Figure S13.** SEM images of primary samples after 24 h stability testing.

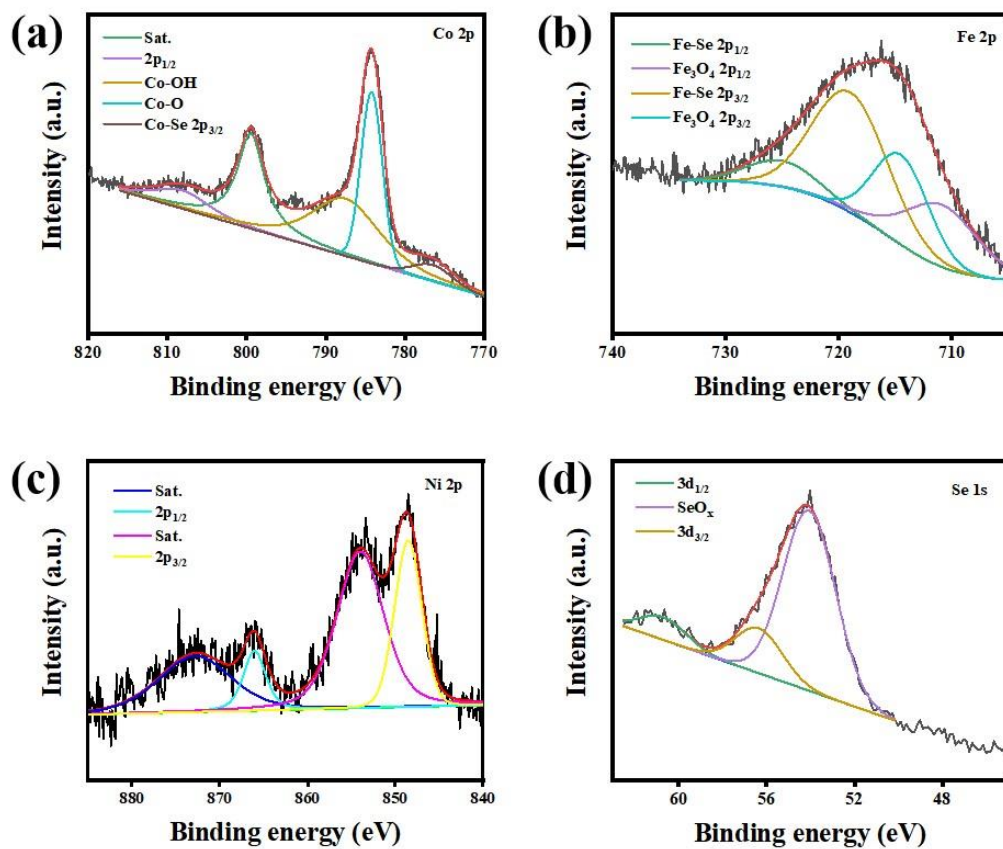

**Figure S14.** XPS spectra of main samples after stability test: (a) Co 2p, (b) Fe 2p, (c) Ni 2p, (d) Se 1s.



**Table S1.** The comparison between this work and other similar work in recent years on the activity of oxygen evolution reaction.

| Catalyst                                                                                            | $\eta$ at 10 mA cm <sup>-2</sup><br>(mV) | Tafel Slope<br>(mV dec <sup>-1</sup> ) | Reference |
|-----------------------------------------------------------------------------------------------------|------------------------------------------|----------------------------------------|-----------|
| Co <sub>9</sub> Se <sub>8</sub> /Ni <sub>3</sub> Se <sub>4</sub> /Fe <sub>3</sub> O <sub>4</sub> @C | 268                                      | 64                                     | This work |
| a-CoSe/Ti                                                                                           | 292                                      | 69                                     | 1         |
| Coral-like CoSe                                                                                     | 295                                      | 40                                     | 2         |
| Ni <sub>0.5</sub> Co <sub>0.5</sub> Se                                                              | 216                                      | 37                                     | 3         |
| WCoSe/WCo <sub>3</sub> O <sub>4</sub>                                                               | 175                                      | 62                                     | 4         |
| Co <sub>0.85</sub> Se-NC/C-750                                                                      | 298                                      | 47                                     | 5         |
| P-NiSe <sub>2</sub> @N-CNTs/NC hybrid                                                               | 306                                      | 61                                     | 6         |
| CoSe <sub>2</sub> @Fe-CoO hybrid                                                                    | 280                                      | 56                                     | 7         |
| (Ni,Fe)Se@NiFe-LDH/NF                                                                               | 253( $\eta_{100}$ )                      | 47                                     | 8         |
| CoSe <sub>2</sub> /FeSe <sub>2</sub> @C                                                             | 290                                      | 62                                     | 9         |
| Fe-Co <sub>2</sub> P@NPDC                                                                           | 320                                      | 61                                     | 10        |
| high-active Co <sub>3</sub> O <sub>4</sub>                                                          | 268                                      | 74                                     | 11        |
| NiCo <sub>2</sub> S <sub>4</sub> /CoFeMo-LDH                                                        | 295( $\eta_{500}$ )                      | 83                                     | 12        |
| B,N-GQDs/MOF-derived-NiFe-LDH                                                                       | 251( $\eta_{100}$ )                      | 35                                     | 13        |
| Fe-doped Ni <sub>3</sub> S <sub>2</sub> /FeS <sub>2</sub>                                           | 230( $\eta_{100}$ )                      | 32                                     | 14        |
| Fe-CoP@Ni <sub>2</sub> P                                                                            | 237( $\eta_{50}$ )                       | 51                                     | 15        |

## References

1. Liu, T.T.; Liu, Q.; Asiri, A.M.; Luo, Y.L.; Sun, X.P. An amorphous CoSe film behaves as an active and stable full water-splitting electrocatalyst under strongly alkaline conditions. *Chem. Commun.* **2015**, *51*, 16683–16686. <https://doi.org/10.1039/C5CC06892D>.
2. Liao, M.; Zeng, G.F.; Luo, T.T.; Jin, Z.Y.; Wang, Y.J.; Kou, X.M.; Xiao, D. Three-dimensional coral-like cobalt selenide as an advanced electrocatalyst for highly efficient oxygen evolution reaction. *Electrochim. Acta.* **2016**, *194*, 59–66. <http://doi.org/10.1016/j.electacta.2016.02.046>.
3. Zhu, L.; Liao, Y.X.; Jia, Y.B.; Zhang, X.; Ma, R.G.; Wang, K.K. Solid-solution hexagonal Ni<sub>0.5</sub>Co<sub>0.5</sub>Se nanoflakes toward the boosted oxygen evolution reaction. *Chem Commun.* **2020**, *56*, 13113–13116. <https://doi.org/10.1039/D0CC05247G>.
4. Balaji, R.; Nguyen, T.T.; Harish, K.; Kim, N.H.; Lee, J.H. Modulating heterointerfaces of tungsten incorporated CoSe/Co<sub>3</sub>O<sub>4</sub> as a highly efficient electrocatalyst for overall water splitting. *J. Mater. Chem. A* **2022**, *10*, 3782–3792. <http://doi.org/10.1039/d1ta09932a>.
5. Han, Y.; Chen, X.; Qian, C.; Zhang, X.Y.; He, W.; Ren, H.J.; Li, H.B.; Diao, G.W.; Chen, M. Co<sub>0.85</sub>Se nanoparticles armored by N-doped carbon layer with electronic structure regulation functions: An efficient oxygen evolution electrocatalyst. *Chem. Eng. J.* **2021**, *420*, 130461. <https://doi.org/10.1016/j.cej.2021.130461>.
6. Yu, J.; Li, W.J.; Kao, G.B.; Xu, C.Y.; Chen, R.R.; Liu, Q.; Liu, J.Y.; Zhang, H.S.; Wang, J. In-situ growth of CNTs encapsulating P-doped NiSe<sub>2</sub> nanoparticles on carbon framework as efficient bifunctional electrocatalyst for overall water splitting. *J. Energy Chem.* **2021**, *60*, 111–120. <https://doi.org/10.1016/j.jechem.2020.12.030>.
7. Ramadoss, M.; Chen, Y.F.; Hu, Y.; Wang, B.; Jeyagopal, R.; Marimuthu, K.; Wang, X.Q.; Yang, D.X. Hierarchically porous nano-architecture constructed by ultrathin CoSe<sub>2</sub> embedded Fe-CoO nanosheets as robust electrocatalyst for water oxidation. *J. Mater. Sci. Technol.* **2021**, *78*, 229–237. <https://doi.org/10.1016/j.jmst.2020.10.058>.
8. Hu, J.; Liang, Y.Q.; Wu, S.L.; Li, Z.Y.; Shi, C.S.; Luo, S.Y.; Sun, H.J.; Zhu, S.L.; Cui, Z.D. Hierarchical nickel-iron layered double hydroxide composite electrocatalyst for efficient oxygen evolution reaction. *Mater. Today Nano.* **2022**, *17*, 100150. <https://doi.org/10.1016/j.mtnano.2021.100150>.

9. Li, W.; Niu, Y.; Wu, X.; Wu, F.; Li, T.; Hu, W. Heterostructured CoSe<sub>2</sub>/FeSe<sub>2</sub> Nanoparticles with Abundant Vacancies and Strong Electronic Coupling Supported on Carbon Nanorods for Oxygen Evolution Electrocatalysis. *ACS Sustainable Chem. Eng.* **2020**, *11*, 4658–4666. <https://doi.org/10.1021/acssuschemeng.0c00839>.
10. Li, L.H.; Zhang, L.; Nie, Z.C.; Ma, W.Y.; Li, N.P.; Wågberg, T.; Hu, G.Z. Tailoring charge reconfiguration in dodecahedral Co<sub>2</sub>P@carbon nanohybrids by triple-doping engineering for promoted reversible oxygen catalysis. *J. Mater. Chem. A* **2022**. <https://doi.org/10.1039/D2TA04482J>.
11. Zhang, T.Y.; Zhao, S.C.; Zhu, C.M.; Shi, J.; Su, C.; Yang, J.W.; Wang, M.; Li, J.; Li, J.H.; Liu, P.L.; et al. Rational construction of high-active Co<sub>3</sub>O<sub>4</sub> electrocatalysts for oxygen evolution reaction. *Nano Res.* **2023**, *16*, 624–633. <https://doi.org/10.1007/s12274-022-4879-2>.
12. Shen, X.R.; Li, H.J.; Zhang, Y.Y.; Ma, T.T.; Li, Q.; Jiao, Q.Z.; Zhao, Y.; Li, H.S.; Feng, C.H. Construction dual-regulated NiCo<sub>2</sub>S<sub>4</sub>@Mo-doped CoFe-LDH for oxygen evolution reaction at large current density. *Appl. Catal. B* **2022**, *319*, 121917. <https://doi.org/10.1016/j.apcatb.2022.121917>.
13. Rinawati, M.; Wang, Y.X.; Huang, W.H.; Wu, Y.T.; Cheng, Y.S.; Kurniawan, D.; Haw, S.C.; Chiang, W.H.; Su, W.N.; Yeh, M.H. Unraveling the efficiency of heteroatom-doped graphene quantum dots incorporated MOF-derived bimetallic layered double hydroxide towards oxygen evolution reaction. *Carbon*. **2022**, *200*, 437–447. <https://doi.org/10.1016/j.carbon.2022.08.067>.
14. Gultom, N.S.; Li, C.H.; Kuo, D.H.; Abdullah, H. Single-Step Synthesis of Fe-Doped Ni<sub>3</sub>S<sub>2</sub>/FeS<sub>2</sub> Nanocomposites for Highly Efficient Oxygen Evolution Reaction. *ACS Appl. Mater. Interfaces*. **2022**, *14*, 39917–39926. <https://doi.org/10.1021/acsaami.2c08246>.
15. Duan, Z.X.; Zhao, D.P.; Sun, Y.C.; Tan, X.J.; Wu, X. Bifunctional Fe-doped CoP@Ni<sub>2</sub>P heteroarchitectures for high-efficient water electrocatalysis. *Nano Res.* **2022**, *15*, 8865–8871. <https://doi.org/10.1007/s12274-022-4673-z>.
